# Supplementary material
Source: Springer Nature journal article supplement (https://www.springermedizin.de/resource/supplementary/12885_2008_1517_MOESM2_ESM.pdf/9472220)
Supplement: MOESM2 [file 9472220]

**A****LfcinB**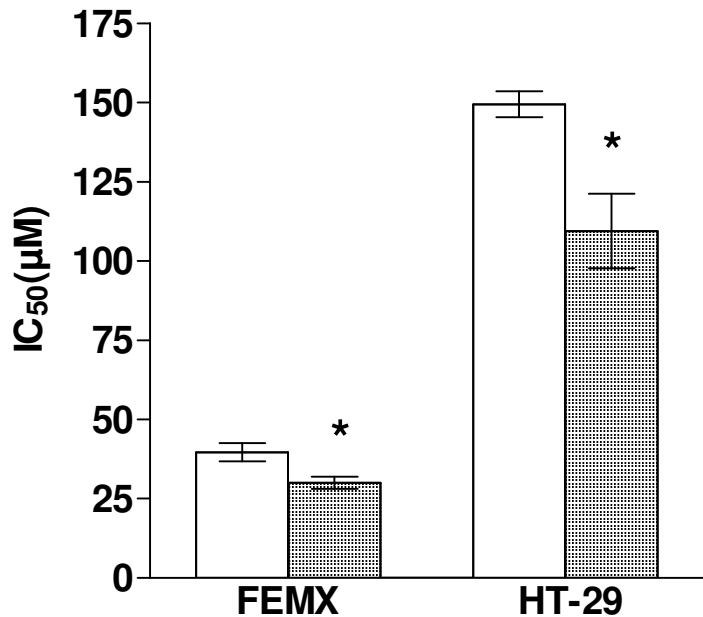

□ Non-treated cells

▒ Sodium chlorate treated cells

**B****KW5**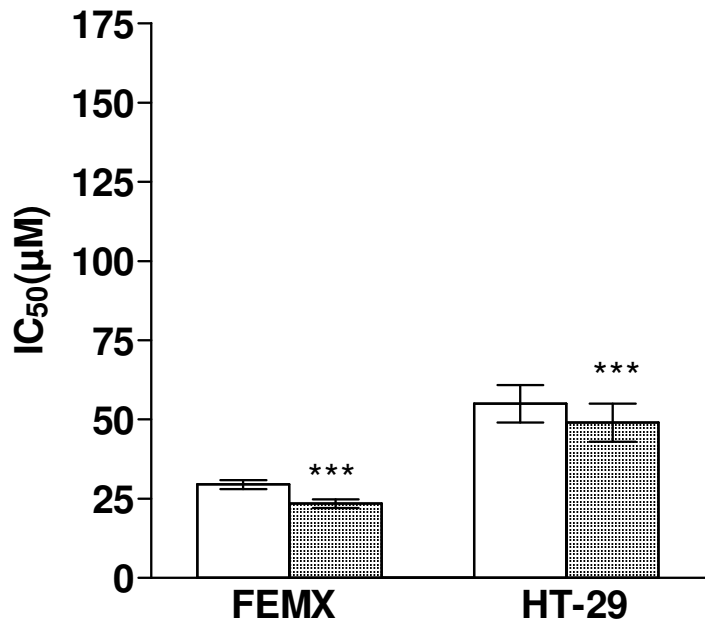

□ Non-treated cells

▒ Sodium chlorate treated cells
